# Supplementary material for: TopFed: TCGA Tailored Federated Query Processing and Linking to LOD
Source: Springer Nature journal article supplement (doi:10.1186/2041-1480-5-47), 2014-01-01
Supplement: 13326_2014_213_MOESM2_ESM.pdf [file 13326_2014_213_MOESM2_ESM.pdf]



Text File



Data Refiner



RDFizer

RDF  
File

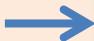

SPARQL endpoint



RDF
