# Supplementary material for: TopFed: TCGA Tailored Federated Query Processing and Linking to LOD
Source: Springer Nature journal article supplement (doi:10.1186/2041-1480-5-47), 2014-01-01
Supplement: 13326_2014_213_MOESM4_ESM.pdf [file 13326_2014_213_MOESM4_ESM.pdf]

| composite element REF | gene_symbol | chromosome | position  | beta_value         | Raw |
|-----------------------|-------------|------------|-----------|--------------------|-----|
| cg00000292            | ATP2A1      | 16         | 28890100  | 0.439271303584937  |     |
| cg00002426            | SLMAP       | 3          | 57743543  | 0.245147665381461  |     |
| cg00003994            | MEOX2       | 7          | 15725862  | 0.0440161061196347 |     |
| cg00005847            | HOXD3       | 2          | 177029073 | 0.741342927038953  |     |
| cg00006414            | ZNF425      | 7          | 148822837 | NA                 |     |
| cg00007981            | PANX1       | 11         | 93862594  | 0.0290713821114479 |     |
| cg00008493            | COX8C       | 14         | 93813777  | 0.985555436681019  |     |
| cg00008713            | IMPA2       | 18         | 11980953  | 0.0109832005732912 |     |
| cg00009407            | TTC8        | 14         | 89290921  | 0.0104525957219692 |     |

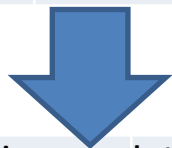

Data Refiner

| chromosome | position  | beta_value         |
|------------|-----------|--------------------|
| 16         | 28890100  | 0.439271303584937  |
| 3          | 57743543  | 0.245147665381461  |
| 7          | 15725862  | 0.0440161061196347 |
| 2          | 177029073 | 0.741342927038953  |
| 11         | 93862594  | 0.0290713821114479 |
| 14         | 93813777  | 0.985555436681019  |
| 18         | 11980953  | 0.0109832005732912 |
| 14         | 89290921  | 0.0104525957219692 |

Refined

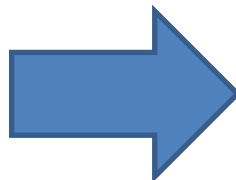

RDFizer

@prefix b:<http://tcga.der.i.e/>.

@prefix d:<http://tcga.der.i.e/schema/bcr\_patient\_barcode>.

@prefix r:<http://tcga.der.i.e/schema/result>.

@prefix c:<http://www.w3.org/1999/02/22-rdf-syntax-ns#type>.

@prefix w:<http://tcga.der.i.e/schema/dna\_methylation\_result>.

@prefix m:<http://tcga.der.i.e/schema/chromosome>.

@prefix v:<http://tcga.der.i.e/schema/position>.

@prefix u:<http://tcga.der.i.e/schema/beta\_value>.

b:TCGA-A2-A0CX d: "TCGA-A2-A0CX".

b:TCGA-A2-A0CX r: b:TCGA-A2-A0CX-d1 .

b:TCGA-A2-A0CX-d1 c: w; ; m: "16"; v: "28890100"; u: "0.439271303584937".

b:TCGA-A2-A0CX r: b:TCGA-A2-A0CX-d2 .

b:TCGA-A2-A0CX-d2 c: w; ; m: "3"; v: "57743543"; u: "0.245147665381461".

b:TCGA-A2-A0CX r: b:TCGA-A2-A0CX-d3 .

b:TCGA-A2-A0CX-d3 c: w; ; m: "7"; v: "15725862"; u: "0.0440161061196347".

b:TCGA-A2-A0CX r: b:TCGA-A2-A0CX-d4 .

b:TCGA-A2-A0CX-d4 c: w; ; m: "2"; v: "177029073"; u: "0.741342927038953".

b:TCGA-A2-A0CX r: b:TCGA-A2-A0CX-d5 .

b:TCGA-A2-A0CX-d5 c: w; ; m: "11"; v: "93862594"; u: "0.0290713821114479".

b:TCGA-A2-A0CX r: b:TCGA-A2-A0CX-d6 .

b:TCGA-A2-A0CX-d6 c: w; ; m: "14"; v: "93813777"; u: "0.985555436681019".

b:TCGA-A2-A0CX r: b:TCGA-A2-A0CX-d7 .

b:TCGA-A2-A0CX-d7 c: w; ; m: "18"; v: "11980953"; u: "0.0109832005732912".

b:TCGA-A2-A0CX r: b:TCGA-A2-A0CX-d8 .

b:TCGA-A2-A0CX-d8 c: w; ; m: "14"; v: "89290921"; u: "0.0104525957219692".

RDFized
